# Supplementary material for: Architecture, flexibility and performance of a special electron linac dedicated to Flash radiotherapy research: electronFlash with a triode gun of the centro pisano flash radiotherapy (CPFR)
Source: Frontiers journal article supplement (doi:10.3389/fphy.2023.1268310), 2023-11-16
Supplement: Data_Sheet_1.docx [file Data_Sheet_1.docx]

Supplementary Material

# Supplementary Figures and Tables

**Supplementary Table 1: Tolerances for the ElectronFLASH Customer Acceptance Test measurements**

| **Name** | **Tolerance** |
| --- | --- |
| Rotational gantry movements | < 1° |
| Rp | 2 mm |
| R50 | 2 mm |
| R90 | NA |
| R100 | NA |
| PDD stability (R50) | 1 mm |
| PDD stability (fields) | 1 mm |
| Symmetry | < 3% |
| Flatness | NA |
| Short term stability | < 2% |
| Long term stability | < 5% |
| Linearity measurements | R2 > 0.995 |
| Linearity dose - MU | < 3% |
| Linearity dose - PRF | < 3% |

##
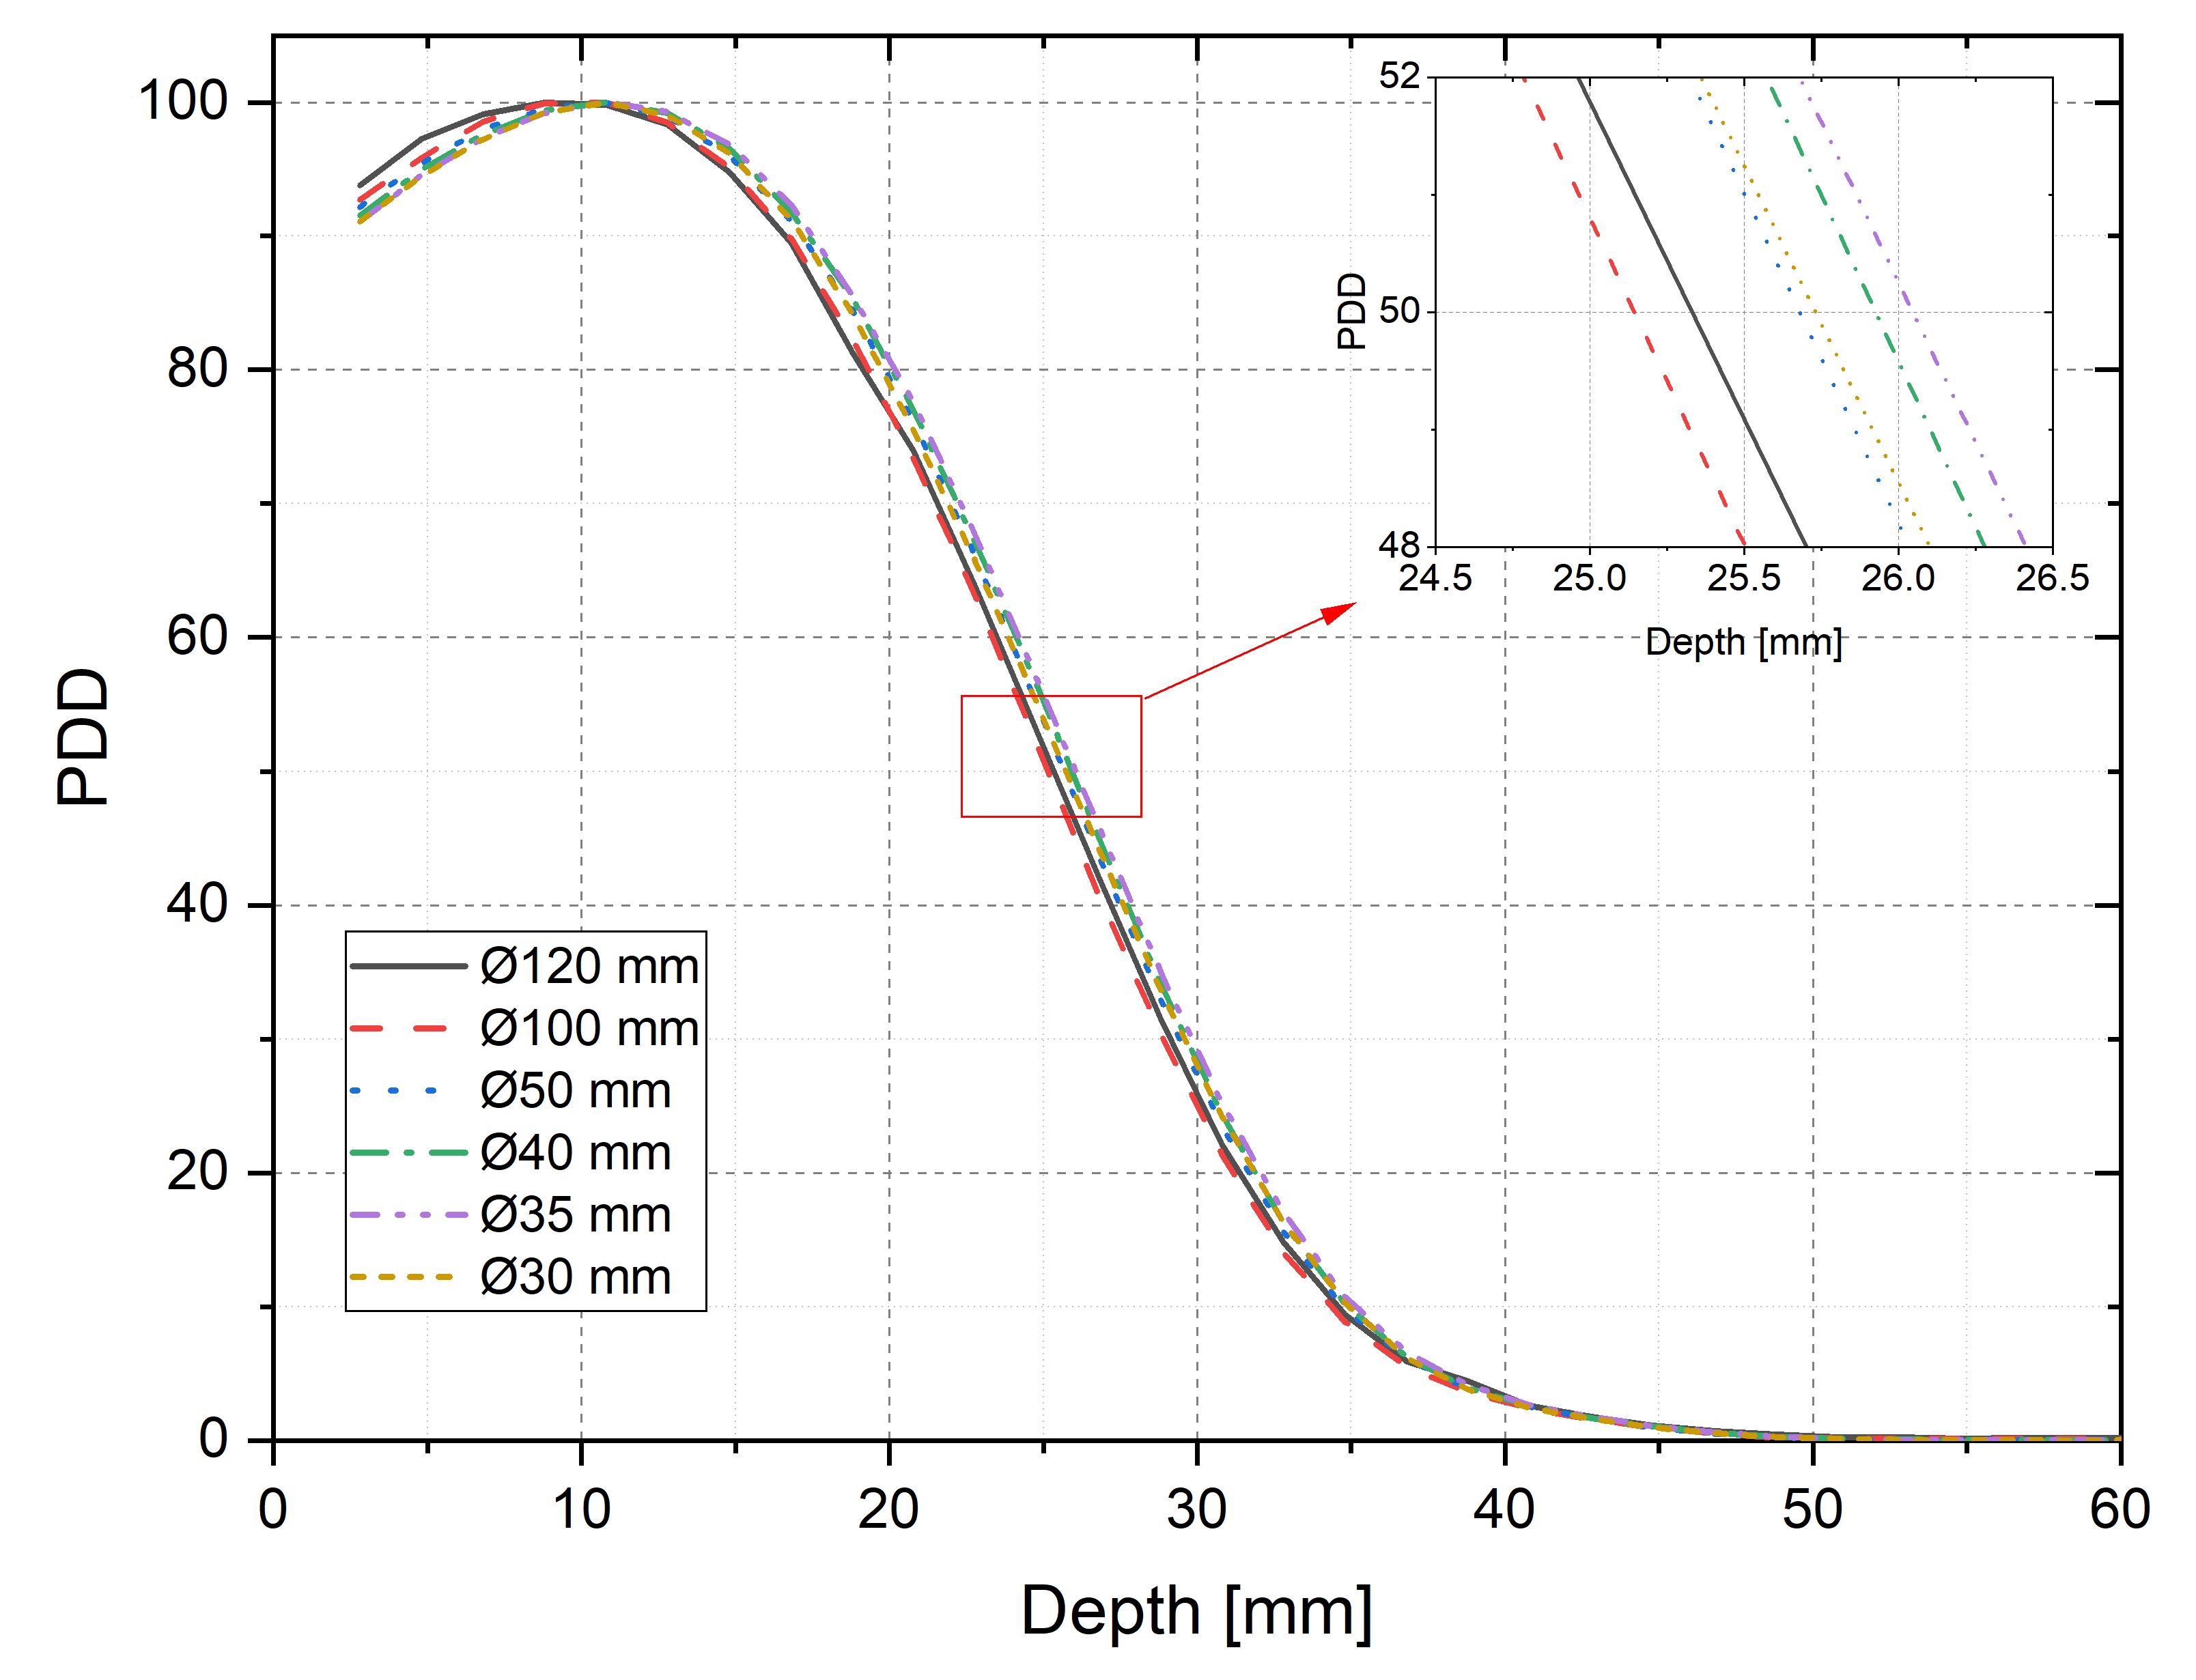
Supplementary Figures

**Supplementary Figure 1.** **7MeV PDDs for various applicators**


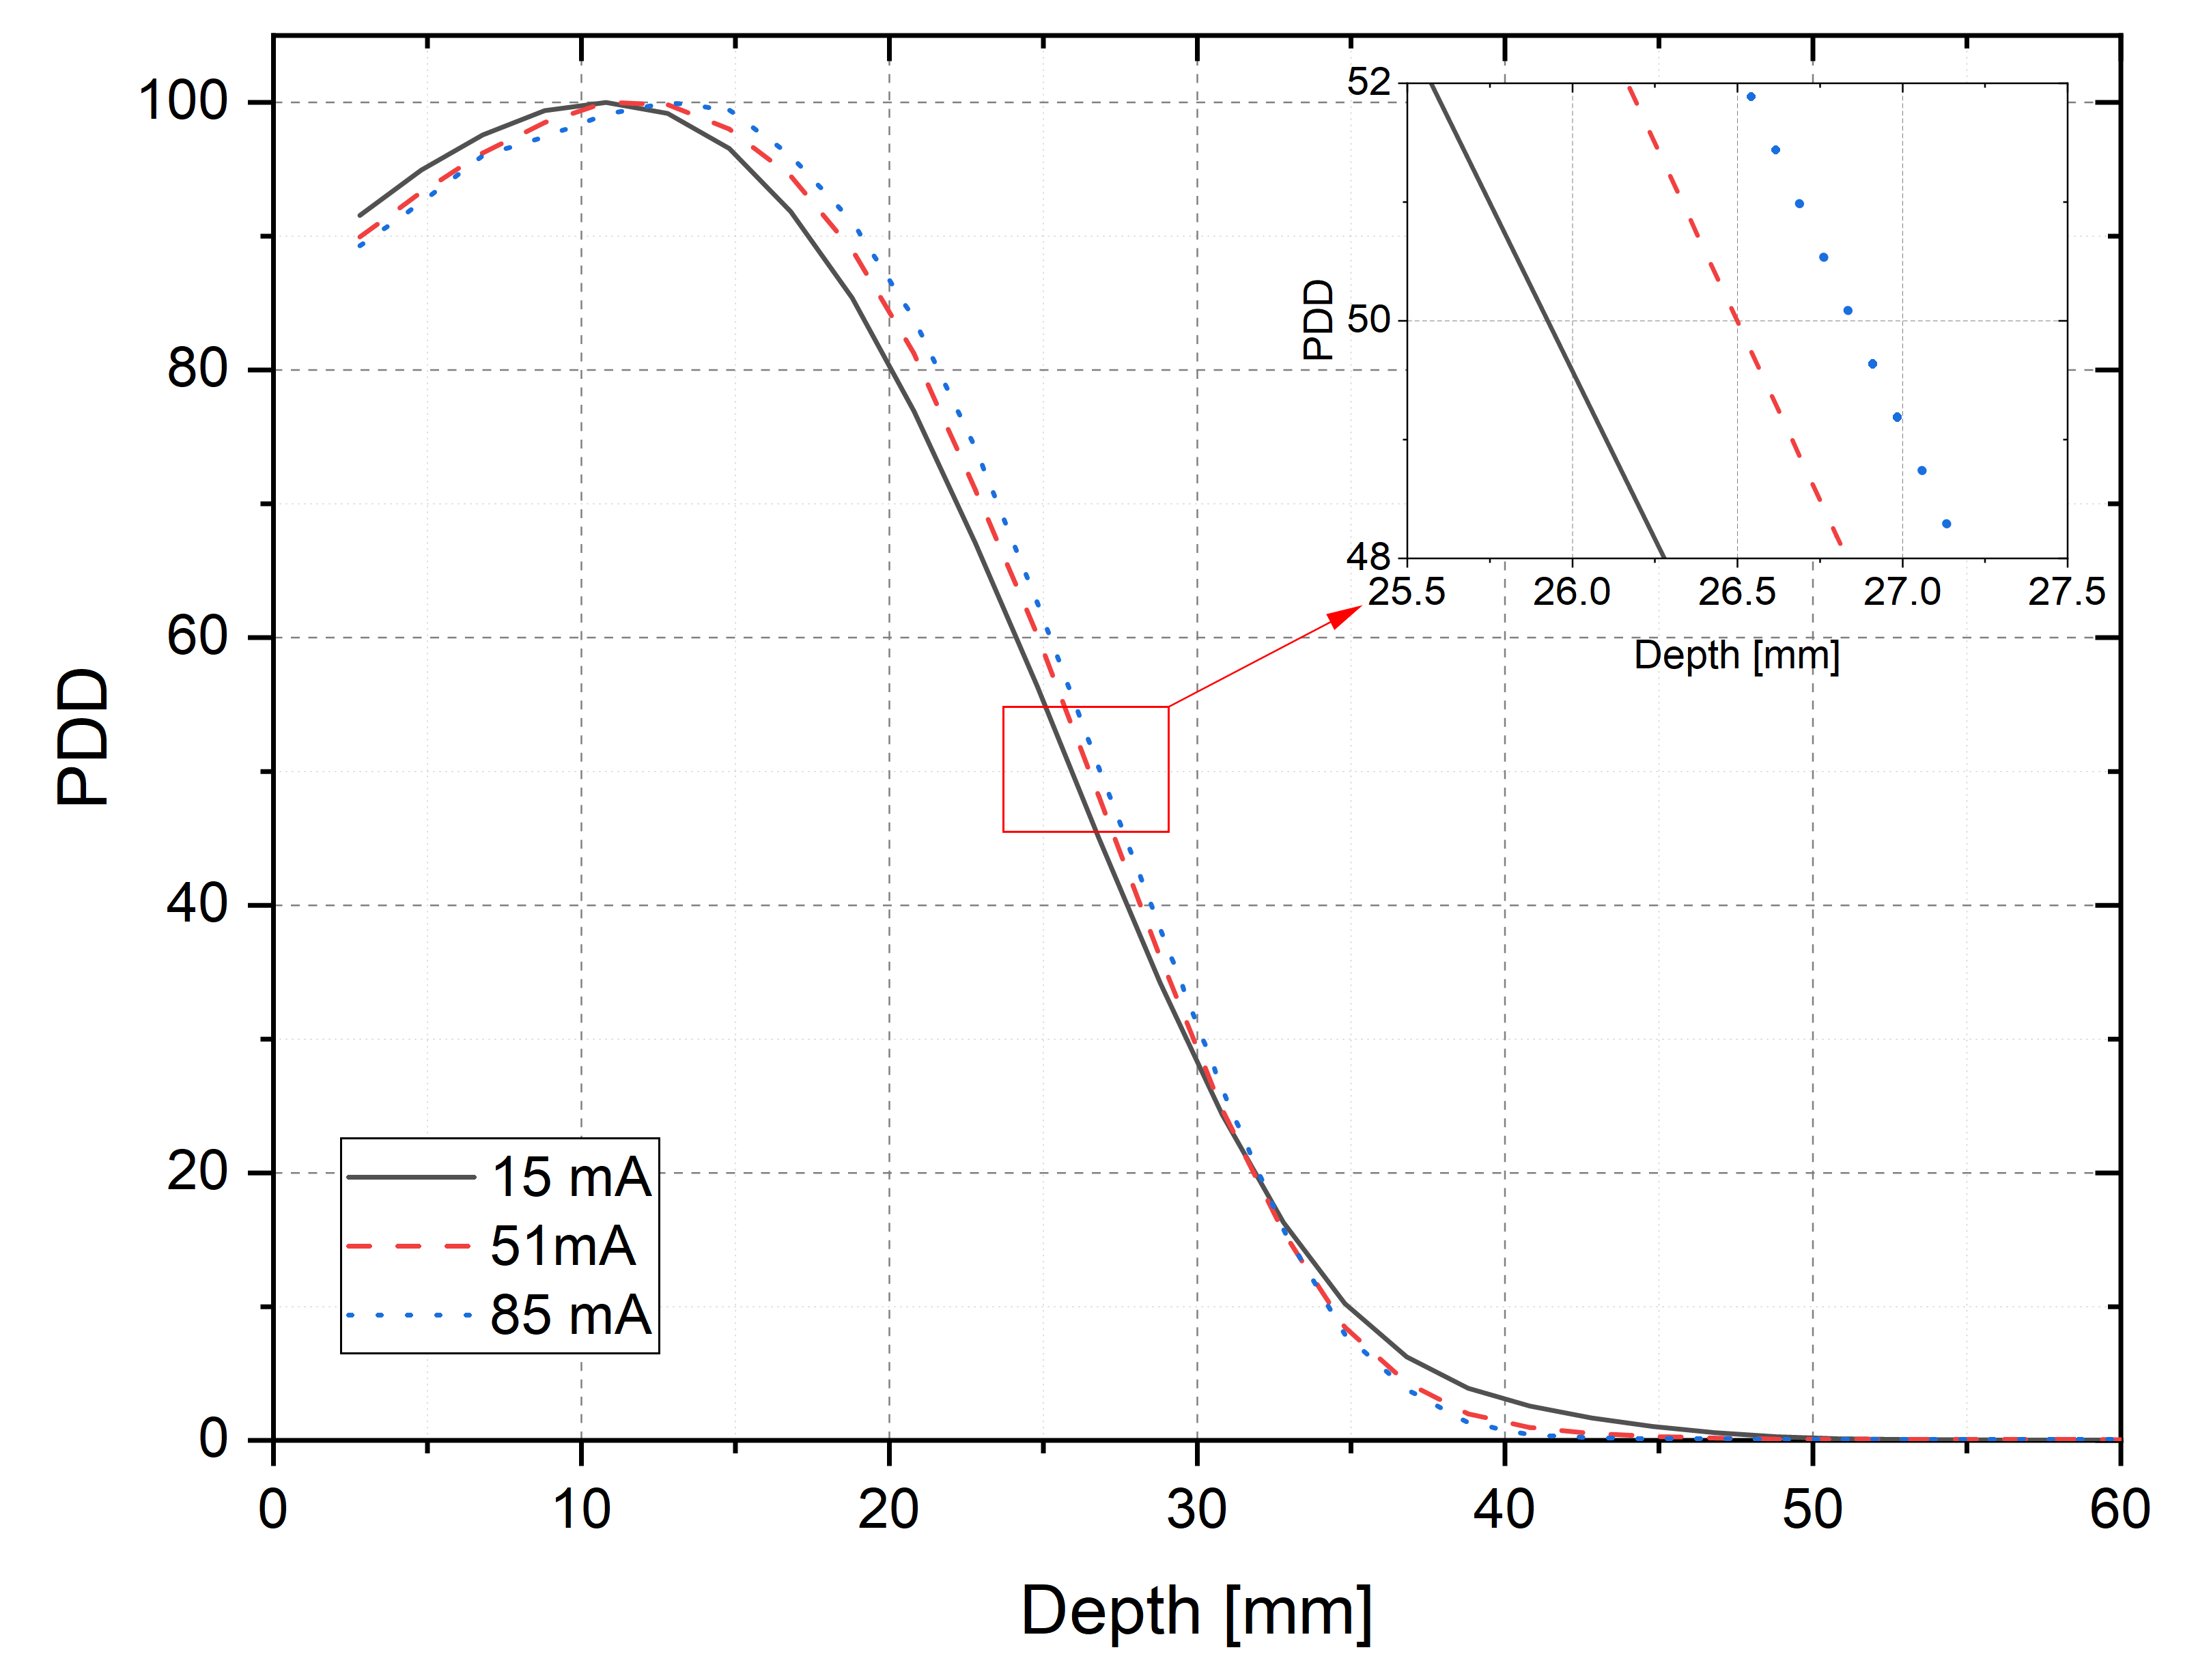
 **Supplementary Figure 2.** **7MeV PDDs for different beam currents**
